# Supplementary material for: Validation of the Combined Biomarker for Prediction of Response to Checkpoint Inhibitor in Patients with Advanced Cancer
Source: MDPI journal article supplement (doi:10.3390/cancers13102316), 2021-05-12
Supplement: s1 [file s1]

# Validation of the Combined Biomarker for Prediction of Response to Checkpoint Inhibitor in Patients with Advanced Cancer

Jin-Chul Kim, You-Jeong Heo, So-Young Kang, Jeeyun Lee and Kyoung-Mee Kim

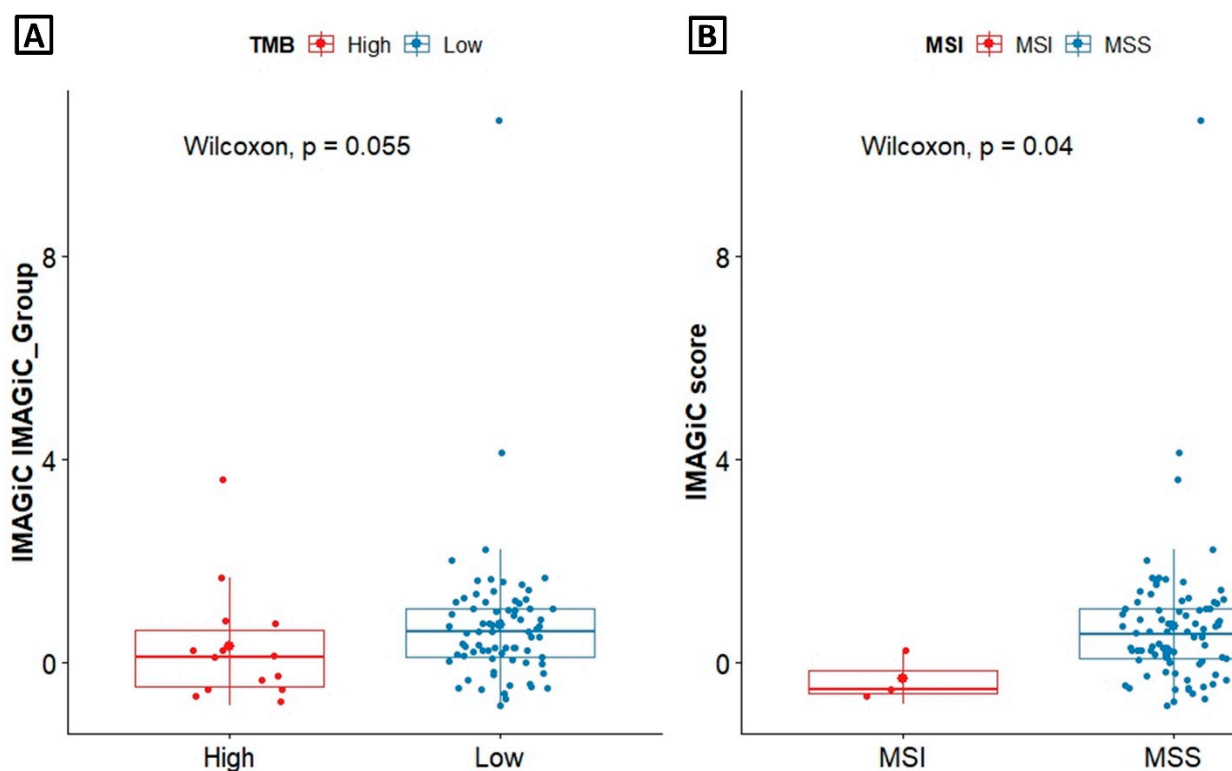

**Figure S1.** IMAGiC score according to (A) TMB and (B) MSI status; median [quartile range]. TMB, tumor mutation burden; MSI, microsatellite instability.

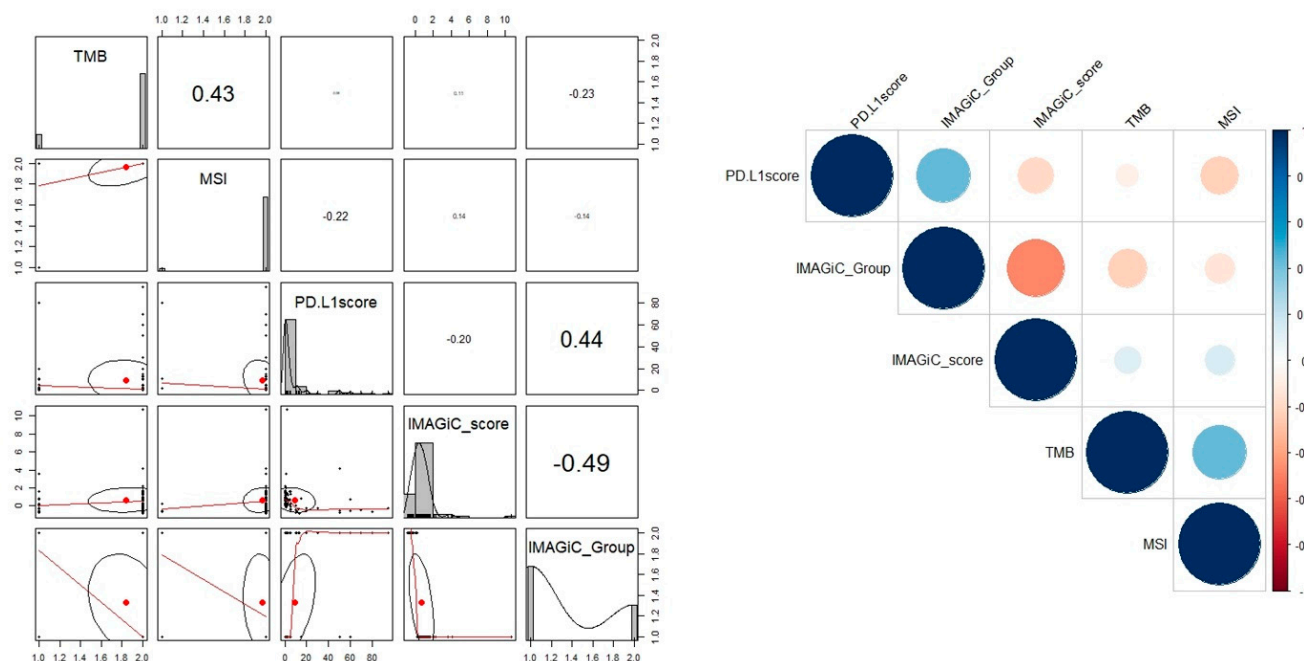

**Figure S2.** Correlations between the IMAGiC model, TMB, MSI status, and PD-L1 CPS. TMB, tumor mutation burden; MSI, microsatellite instability; PD-L1 CPS, programmed death-ligand 1 combined positive score.

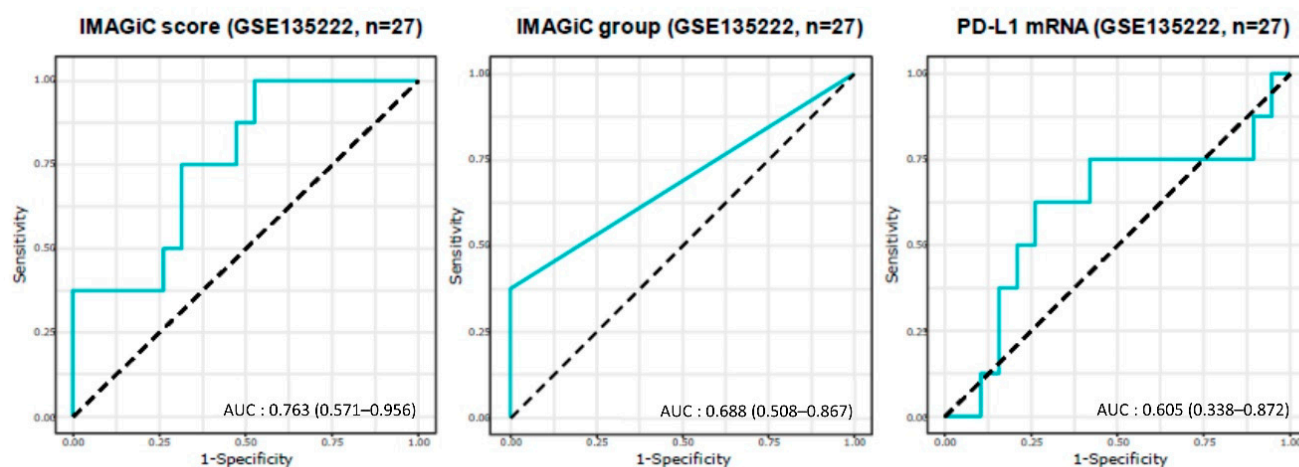

**Figure S3.** ROC curve and AUC of each biomarker based on response to immunotherapy in advanced non-small cell lung cancer cohort.

**Table S1.** Clinical characteristics and biomarker profile according to the IMAGiC responder/non-responder group.

| IMAGiC Group                                     | Non-Responder<br>(n = 70) | Responder<br>(n = 19) | p-Value |
|--------------------------------------------------|---------------------------|-----------------------|---------|
| <b>Gender</b>                                    |                           |                       | 0.309   |
| - Female                                         | 36 (51.4%)                | 10 (52.6%)            |         |
| - Male                                           | 14 (58.3%)                | 23 (46.9%)            |         |
| <b>Age (median &amp; quartile range)</b>         | 60.5 [50.0; 69.0]         | 59.0 [53.5; 72.5]     | 0.663   |
| <b>MSI status</b>                                |                           |                       | 0.114   |
| - MSI-H                                          | 1 (1.4%)                  | 2 (10.5%)             |         |
| - MSS                                            | 69 (98.6%)                | 17 (89.5%)            |         |
| <b>TMB</b>                                       |                           |                       | 0.068   |
| - High                                           | 8 (11.4%)                 | 6 (31.6%)             |         |
| - Low                                            | 62 (88.6%)                | 13 (68.4%)            |         |
| <b>PD-L1 (CPS) (median &amp; quartile range)</b> | 4.5 [0.0; 2.0]            | 20.0 [10.5; 50.0]     | <0.001  |
| <b>TMB (median &amp; quartile range)</b>         | 5.1 [3.1; 7.8]            | 7.0 [5.1; 12.9]       | 0.045   |

Sex, Age; Pearson's Chi-squared test; MSI, TMB; Fisher's Exact test; PD-L1 (CPS), TMB; Wilcoxon-rank sum test. MSI, microsatellite instability; MSI-H, MSI-high; TMB, tumor mutation burden; PD-L1 CPS, programmed death-ligand 1 combined positive score.
